# Supplementary material for: Atmospheric oxidation of new “green” solvents – Part 2: methyl pivalate and pinacolone
Source: Copernicus journal article supplement (doi:10.5194/acp-23-7767-2023), 2023-07-14
Supplement: Supplementary file 1 [file acp-23-7767-2023-supplement.zip]

Archive with 2 entries (2 files):
- Supplementary Info MPA PCO.xlsx
- acp-23-7767-2023-supplement-title-page.pdf
