# Supplementary material for: Atmospheric oxidation of new “green” solvents – Part 2: methyl pivalate and pinacolone
Source: Copernicus journal article supplement (doi:10.5194/acp-23-7767-2023), 2023-07-14
Supplement: Supplementary file 1 [file acp-23-7767-2023-supplement.zip › acp-23-7767-2023-supplement-title-page.pdf]

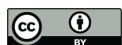

*Supplement of*

## **Atmospheric oxidation of new “green” solvents – Part 2: methyl pivalate and pinacolone**

**Caterina Mapelli et al.**

*Correspondence to:* Terry J. Dillon ([terry.dillon@york.ac.uk](mailto:terry.dillon@york.ac.uk))

- [acp-23-7767-2023-supplement-title-page.pdf](#)
- [Supplementary Info MPA PCO.xlsx](#)

The copyright of individual parts of the supplement might differ from the article licence.
